# Supplementary material for: Identifying the Top Ten Unanswered Questions in Community Nursing: A James Lind Alliance Priority Setting Partnership in Community Nursing
Source: Hindawi journal article supplement (doi:10.1155/2022/2213945), 2022-11-24
Supplement: f1 [file 2213945.f1.zip]

Archive with 2 entries (2 files):
- Appendix 1.pdf
- Appendix 2.pdf
