# Supplementary material for: Identifying the Top Ten Unanswered Questions in Community Nursing: A James Lind Alliance Priority Setting Partnership in Community Nursing
Source: Hindawi journal article supplement (doi:10.1155/2022/2213945), 2022-11-24
Supplement: f1 [file 2213945.f1.zip › Appendix 1.pdf]

*Appendix 1: Summary of key action points from JLA PSP Steering Group Meetings*

| <b>Date of Meeting</b> | <b>Actions</b>                                                                                                                                                                                                    |
|------------------------|-------------------------------------------------------------------------------------------------------------------------------------------------------------------------------------------------------------------|
| July 2020              | Terms of reference approved<br>Review of survey 1<br>Survey 1 dissemination plan discussed                                                                                                                        |
| September 2020         | Protocol update and review<br>Survey 1 revision<br>Identify patients, carers and healthcare professionals to pilot survey                                                                                         |
| October 2020           | Publish protocol on JLA website<br>Finalise survey 1<br>Send pilot survey to patients, carers and healthcare professionals<br>Draft JLA PSP communications plan                                                   |
| November 2020          | Pilot survey with BAME volunteers.<br>Generate social media messages<br>Launch survey 1                                                                                                                           |
| December 2020          | Promote and share survey 1<br>Contact BAME networks to increase reach of survey 1                                                                                                                                 |
| January 2021           | Promote survey 1<br>Create sub-group to facilitate survey 1 analysis                                                                                                                                              |
| February 2021          | Survey 1 closes<br>Sub-group start analysis of survey 1 responses                                                                                                                                                 |
| March 2021             | Draft and review summary questions for survey 2<br>Existing literature reviewed by JLA Information Specialist to identify if any summary questions have been answered                                             |
| April 2021             | Sub-group meeting to discuss evidence gathered to confirm if any questions have already been answered.<br>Finalise survey 2 questions<br>Identify patients, carers and healthcare professionals to pilot survey 2 |
| May 2021               | Launch survey 2<br>Promote and disseminate survey 2 (including via social media)                                                                                                                                  |
| June 2021              | Promote survey 2, especially to patient/carers groups.<br>Invite stakeholders to final workshop                                                                                                                   |
| July 2021              | Invite and confirm stakeholders for final workshop<br>Survey 2 closes<br>Agree questions for final workshop                                                                                                       |
| September 2021         | Host final workshop and agree top ten unanswered questions in community nursing                                                                                                                                   |
