# Supplementary material for: Identifying the Top Ten Unanswered Questions in Community Nursing: A James Lind Alliance Priority Setting Partnership in Community Nursing
Source: Hindawi journal article supplement (doi:10.1155/2022/2213945), 2022-11-24
Supplement: f1 [file 2213945.f1.zip › Appendix 2.pdf]

*Appendix 2: List of organisations contacted to distribute and promote JLA PSP surveys*

| <b>Organisation</b>                                                                     |
|-----------------------------------------------------------------------------------------|
| Queens Nursing Institute                                                                |
| Burdett Trust                                                                           |
| Florence Nightingale                                                                    |
| Community Health Alliance of Research Active Trusts                                     |
| International Collaboration for Community Health Nursing Research                       |
| National District Nurses Network                                                        |
| NIHR 70@70 Senior Nurse Research Leaders                                                |
| BRC links                                                                               |
| Chief Nurses/Directors of Nursing                                                       |
| RCN District and Community Nursing Forum                                                |
| R&D Forum                                                                               |
| Enabling Research in Care Homes                                                         |
| James Lind Alliance                                                                     |
| Age UK                                                                                  |
| National Service User Network                                                           |
| Race equality foundation                                                                |
| SEVA UK                                                                                 |
| Individual NHS Trusts (including community nurses; trust webpages; service user groups) |
| NIHR Applied Research Collaboration                                                     |
| NIHR Clinical Research Network                                                          |
| Healthwatch                                                                             |
| National Carers organisation                                                            |
| Patient and Public Involvement and Research Champion Groups                             |
| BAME networks                                                                           |
| Social media networks                                                                   |
| Care Home Staff                                                                         |
| Hospital chaplains                                                                      |
| CHART Network                                                                           |
